# Supplementary material for: The diagnosis and management of antibiotic allergy in children: Systematic review to inform a contemporary approach
Source: HighWire-hosted journal article supplement (doi:10.1136/archdischild-2014-306280), 2014-12-19
Supplement: archdischild-2014-306280supp_tables.pdf [file archdischild-2014-306280supp_tables.pdf]

**Table 1. Studies investigating adverse drug reaction prevalence using population-based designs amongst children**

| <i>First author Year</i> | <i>Study type Country, language</i>                                          | <i>No. of study subjects, age</i>                                             | <i>Inclusion criteria</i>                                                                  | <i>Antibiotic DPT protocol</i>  | <i>Skin testing protocol</i>    | <i>Results</i>                                                                                                                                                                                                                                                                                                                                                                                                                                                                                    | <i>Quality score (of 7)</i> |
|--------------------------|------------------------------------------------------------------------------|-------------------------------------------------------------------------------|--------------------------------------------------------------------------------------------|---------------------------------|---------------------------------|---------------------------------------------------------------------------------------------------------------------------------------------------------------------------------------------------------------------------------------------------------------------------------------------------------------------------------------------------------------------------------------------------------------------------------------------------------------------------------------------------|-----------------------------|
| Bourgeois, 2009          | Retrospective review of National Center for Health Statistics, USA, English  | 6,445,252 visits over 11 yr period were related to Adverse Reactions to Drugs | Interrogation of A&E and out-patient visit data listing related Adverse Reactions to Drugs | Not undertaken by study authors | Not undertaken by study authors | Mean number of medical visits annually for adverse drug reactions in USA was 585,922. 253,101 (43% (CI 36 – 51%)) of these visits related to children 0 – 4 yrs. Antibiotics were most frequently implicated agents, amongst 28% (CI 22 – 35%), and more commonly amongst younger age group.                                                                                                                                                                                                      | 3                           |
| Kimland, 2005            | Retrospective clinical case series from database of records, Sweden, English | 5,771, 0 – 16 yrs                                                             | Cases of adverse drug reactions reported to Swedish Medical Products Agency                | Not undertaken                  | Not undertaken                  | 385 reports completed per year over 15 years, for 1.7 million Swedish children. Most common symptoms were site reaction (24%), fever (12%) and exanthema (7%). Most common groups of drugs were vaccines (64%) and systemic antibiotics (10%; 149 (6%) Amox, 134 (5%) Cefaclor, 45 (2%) Pen A, 38 (2%) Co-Trimoxazole out of 2501 non-vaccines). 13% of reports required in-patient treatment, or resulted in disability of death (8 fatal (0.14%); none antibiotic related). 61% were 0 – 4 yrs. | 3                           |
| Orhan, 2008              | Retrospective questionnaire Turkey, English                                  | 2,855, 6 – 9 yrs                                                              | School attending general paediatric population                                             | Not undertaken by study authors | Not undertaken by study authors | 81 (3%) of parents reported drug allergy, 48 (59%) of who implicated beta-lactams, 9 (11%) to Co-Trim. 14 (17%) reported multi-system reactions to beta-lactams.                                                                                                                                                                                                                                                                                                                                  | 3                           |

|               |                                                         |                                                  |                                                                |                                 |                                 |                                                                                                                                                                                                                                                                                                                                                                                                           |   |
|---------------|---------------------------------------------------------|--------------------------------------------------|----------------------------------------------------------------|---------------------------------|---------------------------------|-----------------------------------------------------------------------------------------------------------------------------------------------------------------------------------------------------------------------------------------------------------------------------------------------------------------------------------------------------------------------------------------------------------|---|
| Broides, 2010 | Retrospective clinical database review, Israel, English | 26,665 records (n=11,069 Jewish, 15,586 Bedouin) | Patient records listing beta-lactam allergy                    | None reported                   | None reported                   | 344 diagnosed beta-lactam allergic. 226 (2%) were Jewish; 118 (1%) were Bedouin, $p < 0.001$ , although no adjustment made for relative prescription or cultural exposures. Boys more common than girls (135 (60%) of Jewish, 81 (69%) Bedouin respectively, $p < 0.01$ ). Although higher incidence of tonsillitis found amongst Jewish children and greater Amox prescription amongst Bedouin children. | 2 |
| Lange, 2008   | Retrospective questionnaire Denmark, English            | 1,447, 0 – 18 yrs                                | Questionnaire amongst acute and elective paediatric admissions | Not conducted by study authors  | Not conducted by study authors  | Lifetime prevalence of adverse drug reactions 108 (8%), six of these being severe with three reported anaphylaxis. 61 (4%) reported symptoms consistent with allergic mechanism, and 52 (85%) of these were to antibiotics.                                                                                                                                                                               | 2 |
| Ibia, 2000    | Retrospective clinical database review, USA, English    | 5,923 records reviewed, 0 – 16 yrs               | Suspected antibiotic allergy                                   | Not undertaken                  | Not undertaken                  | 3,996 (68%) received antibiotics, of which 472 (12%) were documented to have a rash whilst being treated. Rashes were recorded in 12% receiving Cefaclor, 7% Pen, 9% Sulfonamides, 3% other Ceph: precise number of patients not given                                                                                                                                                                    | 1 |
| Tan, 2009     | Cross-sectional questionnaire study amongst general     | 4480, 7 – 16yrs                                  | Questionnaire requesting adverse drug reaction history         | Not undertaken by study authors | Not undertaken by study authors | 5% of children reported adverse responses to drugs, 57% of whom specified beta-lactams. Multiple drug adverse reactions reported by 4%. Only 7% were referred for further                                                                                                                                                                                                                                 | 1 |

|              | population, Singapore, English                                                                                                           |                                                                                                       |                                                              |                |                | investigations.                                                                                                                                                                                                                                                                                                                 |   |
|--------------|------------------------------------------------------------------------------------------------------------------------------------------|-------------------------------------------------------------------------------------------------------|--------------------------------------------------------------|----------------|----------------|---------------------------------------------------------------------------------------------------------------------------------------------------------------------------------------------------------------------------------------------------------------------------------------------------------------------------------|---|
| Oshikoya2007 | Retrospective clinical case series from medical records & prospective investigation of clinical adverse drug reactions, Nigeria, English | 3,139 records assessed retrospectively, 682 admitted prospectively. 44 children identified, 0 -12 yrs | Suspected adverse drug reactions                             | Not undertaken | Not undertaken | 14 (32%) demonstrated EM, two fixed drug eruption, two SJS and one anaphylaxis (2%; to Ceftriaxone)                                                                                                                                                                                                                             | 1 |
| Le, 2006     | Retrospective clinical case series, USA, English                                                                                         | 1,087, upper age limit not reported                                                                   | Adverse drug reactions reported within paediatric department | Not undertaken | Not undertaken | 371 (40.4%) of 919 adverse drug reaction subjects were under 5 yrs of age. Low severity of adverse drug reactions predominated (89%), resulting mostly from antibiotics. Adverse drug reactions occurring in theatre or presenting to A&E were more severe, and more frequently involved anti-convulsant/neoplastic agents      | 1 |
| Kidon, 2004  | Retrospective case control study from medical records database, Singapore, English                                                       | 222 with adverse drug reaction cases, 0 – 17 yrs, 450 control children admitted                       | Adverse drug reaction reported in medical records            | Not undertaken | Not undertaken | 151 (68%) attributed to antibiotics (100 (45%) being beta-lactams). Multiple regression analysis comparing clinical characteristic of all drug reactions (including non-antibiotics) found that having asthma and other chronic diseases significantly raised the risk of developing an adverse responses whilst being treated. | 1 |

|                       |                                                           |             |                                                                     |                |                |                                                                                                           |   |
|-----------------------|-----------------------------------------------------------|-------------|---------------------------------------------------------------------|----------------|----------------|-----------------------------------------------------------------------------------------------------------|---|
| Padilla Serrato, 2006 | Questionnaire amongst asthmatic children, Mexico, Spanish | 90 children | Evaluated children on asthma summer camp for adverse drug reactions | Not undertaken | Not undertaken | Eight (9%) had history of reacting to drugs: four (4%) to Pen, one (1%) to Trimethoprim-Sulphomethaxazole | 0 |
|-----------------------|-----------------------------------------------------------|-------------|---------------------------------------------------------------------|----------------|----------------|-----------------------------------------------------------------------------------------------------------|---|

**Table 2. Studies investigating suspected immediate and non-immediate non-serious antibiotic allergic children**

| <i>First author<br/>Year</i> | <i>Study type<br/>Country,<br/>language</i>                                                                                           | <i>No. of study<br/>subjects,<br/>age</i>                                                          | <i>Inclusion criteria</i>                                                                                                                         | <i>Antibiotic DPT<br/>protocol</i>                                                                                                                                        | <i>Skin /<br/>sensitisation<br/>testing protocol</i>                                                                                                                              | <i>Results</i>                                                                                                                                                                                                                                                                                                                                                                                                                                                                                                    | <i>Quality score<br/>(out of 7)</i> |
|------------------------------|---------------------------------------------------------------------------------------------------------------------------------------|----------------------------------------------------------------------------------------------------|---------------------------------------------------------------------------------------------------------------------------------------------------|---------------------------------------------------------------------------------------------------------------------------------------------------------------------------|-----------------------------------------------------------------------------------------------------------------------------------------------------------------------------------|-------------------------------------------------------------------------------------------------------------------------------------------------------------------------------------------------------------------------------------------------------------------------------------------------------------------------------------------------------------------------------------------------------------------------------------------------------------------------------------------------------------------|-------------------------------------|
| Rubio,<br>2012               | Retrospective<br>clinical case<br>series,<br>comparing<br>children to<br>adults with<br>proven drug<br>allergy,<br>France,<br>English | 3,275 total,<br>including<br>subset of<br>658 children<br>aged 0 – 18<br>yrs                       | Suspected drug<br>allergy                                                                                                                         | Single blinded<br>incremental<br>dosing DPTs<br>conducted with<br>index drug,<br>when skin<br>testing<br>negative, no<br>report of FU<br>courses for<br>antibiotics       | SPT & ID<br>testing in line<br>with European<br>guidance.                                                                                                                         | The prevalence of +ve tests was<br>10.6% (CI 8.3 – 13.0) for<br>children, and significantly<br>different to prevalence<br>amongst adults of 16.5% (CI<br>15.2 – 17.8) (p<0.0001).<br>Amongst sub-types of index<br>reactions, this was mainly<br>observed amongst beta-<br>lactams, and the difference was<br>significant for maculopapular<br>rashes, but not<br>urticaria/angioedema, nor<br>anaphylaxis. 31 (9.6%) of beta-<br>lactam histories amongst<br>children were associated with<br>+ve investigations | 5                                   |
| Rebelo-<br>Gomes,<br>2008    | Prospectively<br>introduced<br>clinical<br>protocol,<br>Portugal,<br>English                                                          | 1,426<br>completed<br>survey<br>0 – 16 yrs<br><br>N=67<br>suspected<br>drug allergy,<br>0 – 16 yrs | Questionnaire<br>amongst families<br>attending<br>paediatric out-<br>patient clinic.<br>Suspected drug<br>allergy identified<br>then investigated | Incremental<br>DPT, without<br>FU course<br>stipulated for<br>antibiotics. All<br>underwent<br>DPT, however<br>to alternative<br>drug where +ve<br>skin test<br>elicited. | Skin testing<br>amongst all<br>suspected<br>antibiotic<br>allergy: SPT &<br>ID to PPL,<br>MDM, Amox,<br>Pen G, CephS,<br>Co-<br>Trimoxazole.<br><br>Serum sIgE to<br>beta-lactams | From questionnaire, 143 (10%)<br>reported adverse responses to<br>drugs, with 67 (6%) parents<br>reporting an allergy. 37 (3%)<br>already had a diagnosis of drug<br>allergy. 60 attended for further<br>review, of whom 34 were<br>suitable for investigation and<br>underwent DPT. Index reactions<br>were to antibiotics in 25 (74%):<br>Amox in 5, Co-Amox in 6, CephS<br>3, Co-Trimoxazole in 3,<br>Macrolide in 3, more than one<br>beta-lactam 4, beta-lactam +<br>other drug in 1. One (4%) skin          | 5                                   |

|                   |                                                                                                                                                                  |                   |                                                                            |                                                                                                                                                                                                                                 |                                                                                                                                                                                        |                                                                                                                                                                                                                                                                                                                                                                                                                                                                                                                                                                                                                                    |   |
|-------------------|------------------------------------------------------------------------------------------------------------------------------------------------------------------|-------------------|----------------------------------------------------------------------------|---------------------------------------------------------------------------------------------------------------------------------------------------------------------------------------------------------------------------------|----------------------------------------------------------------------------------------------------------------------------------------------------------------------------------------|------------------------------------------------------------------------------------------------------------------------------------------------------------------------------------------------------------------------------------------------------------------------------------------------------------------------------------------------------------------------------------------------------------------------------------------------------------------------------------------------------------------------------------------------------------------------------------------------------------------------------------|---|
|                   |                                                                                                                                                                  |                   |                                                                            |                                                                                                                                                                                                                                 |                                                                                                                                                                                        | test of the 25 potential antibiotic allergies was +ve to Ceftriaxone, so this case underwent DPT to Amox, and passed. Two (8%) DPTs were positive to index antibiotics (Amox & Co-Trimoxazole) in different cases.                                                                                                                                                                                                                                                                                                                                                                                                                 |   |
| Hershkovich, 2009 | Prospectively introduced clinical protocol, with FU repeat testing 1 – 5 months later amongst participants with negative tests from first visit, Israel, English | 166, 0 – 16 yrs   | Suspected beta lactam allergy, excluding anaphylaxis and non-IgE syndromes | If skin testing negative after first or FU visit, one single oral dose of index antibiotic given, with 1 hr monitoring and phone call 72 hrs later.<br><br>FU repeat investigation 1 – 5 months after first visit: DPT repeated | SPT & ID: PPL, BP, MDM, MDM of Amp & Cloxacillin, (+ Cefuroxime & Cefamezin if indicated).<br><br>FU repeat investigation 1 – 5 months after first visit: SPT & ID to index antibiotic | 150 children had suspected reaction to Pen, Amox or Co-Amox, and 16 to Cephs. Four participants demonstrated +ve skin testing, six demonstrated +ve DPT; 10 diagnosed beta lactam allergic and not investigated further. 98 of the remaining 156 completed second round FU assessment, with one demonstrating +ve skin test to Pen, and another developing a maculopapular rash 30 minutes after FU DPT single dose. A subsequent questionnaire completed by 71 participants showed that 59 (83%) had received beta-lactams, and one developed a rash after Amox. Therefore, 3% re-sensitisation rate after negative investigation | 5 |
| Ponvert, 2011 *   | Retrospective clinical case series, France, English                                                                                                              | 1,865, 0 – 18 yrs | Suspected beta-lactam allergy                                              | Incremental DPTs undertaken if no history of SSS, SJS or TEN. If skin testing +ve, DPT                                                                                                                                          | SPT & ID: Amox, Amp, Aztreonam, BP, Cefadroxil, Cefazolin, Cefixime, Cefotaxime,                                                                                                       | 1431 (77%) completed investigations. 227 (16%) were diagnosed allergic to beta-lactams: 50 (31%) of the 162 reporting immediate reactions, and in 177 (17%) of the 1087 reporting non-immediate                                                                                                                                                                                                                                                                                                                                                                                                                                    | 4 |

|              |                                                                                                                           |                 |                                                                                                             |                                                                                                                                       |                                                                                                                                     |                                                                                                                                                                                                                                                                                                                                                                                                                                                                                                                                                     |   |
|--------------|---------------------------------------------------------------------------------------------------------------------------|-----------------|-------------------------------------------------------------------------------------------------------------|---------------------------------------------------------------------------------------------------------------------------------------|-------------------------------------------------------------------------------------------------------------------------------------|-----------------------------------------------------------------------------------------------------------------------------------------------------------------------------------------------------------------------------------------------------------------------------------------------------------------------------------------------------------------------------------------------------------------------------------------------------------------------------------------------------------------------------------------------------|---|
|              |                                                                                                                           |                 |                                                                                                             | undertaken to alternative. Incremental DPT of index antibiotic administered, with FU course for 3 – 10 days.                          | Ceftazidime, Ceftriaxone, Cefuroxime, Cephaloridin, Cephalotin, Cephmandole, Imipenem, Oxacillin, Pen A, Piperacillin & Ticarcillin | reactions. Skin testing diagnosed 76% and 15% of immediate and non-immediate reactions respectively.                                                                                                                                                                                                                                                                                                                                                                                                                                                |   |
| Herve, 1998  | Prospectively introduced clinical protocol France, French                                                                 | 112, 0 – 15 yrs | Suspected Amox allergy                                                                                      | If skin testing negative, incremental Amox DPT up to therapeutic dose, without further course, and FU phone call 4 days later         | SPT & ID: PPL, MDM, Amox, Co-Amox Serum RAST, ELISA, Farr and histamine release testing to Pen                                      | Of 112, 39 (35%) demonstrated +ve skin testing, 6 (5%) +ve serological testing. 52 (78%) of 67 participants completed DPT, with 6 of these (12%) demonstrating +ve reaction consisting of self-limiting rash.                                                                                                                                                                                                                                                                                                                                       | 4 |
| Caubet, 2011 | Prospectively introduced clinical protocol with consecutive recruitment of suspected cases from A&E, Switzerland, English | 88, 0 – 16 yrs  | Suspected beta-lactam allergy, excluding clinically diagnostic viral-induced rash, SJS, DRESS & anaphylaxis | All participants underwent oral DPT with therapeutic drug, in split doses initially if skin test positive, and continued for 48 hours | SPT and ID to PPL, MDM, Amox + the relevant Ceph if implicated in history. Serum sIgE to Pen G, Pen V & Amox.                       | History of rash starting average of 3.8 days after first dose index reaction. 11 (13%) of 88 patients tested demonstrated +ve ID tests. All had sIgE <0.35. 6 (6.8%) demonstrated positive oral DPT with rash (one at 30 minutes, five ranging between 7 – 12 hours after first dose). Only four of the six reacting on DPT had positive ID tests: Sensitivity for ID testing 66.7%, specificity 91.5%. (Amongst patients with urticaria: sensitivity 75% & specificity 92%; amongst delayed maculopapular rash: sensitivity 50% & specificity 87%) | 4 |

|                                        |                                                                            |                                                  |                                       |                                                                                                                                                                                                  |                                         |                                                                                                                                                                                                                                                                                                                                                                                                                                                                                                                                                                                                                                                                |   |
|----------------------------------------|----------------------------------------------------------------------------|--------------------------------------------------|---------------------------------------|--------------------------------------------------------------------------------------------------------------------------------------------------------------------------------------------------|-----------------------------------------|----------------------------------------------------------------------------------------------------------------------------------------------------------------------------------------------------------------------------------------------------------------------------------------------------------------------------------------------------------------------------------------------------------------------------------------------------------------------------------------------------------------------------------------------------------------------------------------------------------------------------------------------------------------|---|
| Atanaskovi<br>c-<br>Markovic<br>2012 * | Prospectively<br>introduced<br>clinical<br>protocol,<br>Serbia,<br>English | 279<br>completed<br>investigation;<br>2 – 14 yrs | Suspected<br>multiple drug<br>allergy | Single day DPT,<br>if skin testing<br>negative                                                                                                                                                   | SPT and ID to<br>PPL, MDM, BP<br>& Amox | 179 reported reactions to more<br>than one class of antibiotic, 245<br>reported reactions to beta-<br>lactams, and 167 to non beta-<br>lactam antibiotics. 606 reactions<br>reported, 80 of which<br>immediate symptoms. 15<br>demonstrated SPT positivity,<br>and a different 2 demonstrated<br>DPT positivity to only one<br>antibiotic and were negative on<br>DPT to other drug. 7<br>demonstrated +ve<br>investigations to two drug<br>groups, however five involved<br>one antibiotic and one non-<br>antibiotic combinations, and the<br>only participant reacting to two<br>antibiotics demonstrated<br>delayed reactions to BP and Co-<br>trimoxazole | 4 |
| Mori,<br>2010                          | Retrospective<br>clinical case<br>series, Italy,<br>English                | 64,<br>1-17yrs                                   | Suspected Clarithr<br>allergy         | Incremental<br>single blinded<br>DPT to Clarithr,<br>with 5 day FU<br>course,<br>amongst all<br>cases. Delayed<br>DPT responses<br>were<br>investigated<br>with double-<br>blind DPT<br>protocol | SPT & ID to<br>Clarithr                 | All SPTs were negative, however<br>nine (14%) participants<br>demonstrated +ve responses to<br>ID testing. All participants also<br>completed the DPT, with four<br>(6%) demonstrating +ve<br>responses (urticaria /<br>angioedema within 20 minutes<br>for two, and delayed<br>maculopapular rashes after 3<br>days in two further participants,<br>which was confirmed as per<br>double-blind protocol). Clarithr<br>ID testing demonstrated 75%<br>sensitivity and 90% specificity                                                                                                                                                                          | 4 |



|                                    |                                                                                                                                                                                      |                                                                                                    |                                                   |                                                                                                                                                                                        |                                                                                                                                                                                                                    |                                                                                                                                                                                                                                                                                                                                                                                                      |   |
|------------------------------------|--------------------------------------------------------------------------------------------------------------------------------------------------------------------------------------|----------------------------------------------------------------------------------------------------|---------------------------------------------------|----------------------------------------------------------------------------------------------------------------------------------------------------------------------------------------|--------------------------------------------------------------------------------------------------------------------------------------------------------------------------------------------------------------------|------------------------------------------------------------------------------------------------------------------------------------------------------------------------------------------------------------------------------------------------------------------------------------------------------------------------------------------------------------------------------------------------------|---|
| Atanaskovic-<br>Markovic<br>2005 * | Retrospective<br>clinical case<br>series,<br>Yugoslavia,<br>English                                                                                                                  | 1170,<br>0 - 14 yrs                                                                                | Suspected Pen & /<br>or Ceph<br>immediate allergy | SBPC DPT<br>performed if<br>skin testing<br>negative, single<br>day exposure                                                                                                           | SPT & ID: PPL,<br>MDM, BP, Pen<br>A, Amox, Amp,<br>Cefalexin,<br>Cefaclor,<br>ceftriaxone &<br>Cefotaxime.<br>Serum sIgE to<br>penicilloyl G,<br>penicilloyl V,<br>amoxicilloyl,<br>ampicilloyl ><br>0.35kU/l +ve. | 252 (42%) of children reacting<br>to skin / DPT demonstrated<br>positive sIgE to at least one<br>agent. Skin and DPT positivity<br>conflated into one category<br>throughout study design –<br>cannot distinguish utility of<br>either investigation. All sIgE<br>positive subjects demonstrated<br>skin or DPT positivity.                                                                          | 3 |
| Jost, 2006                         | Retrospective<br>clinical case<br>series 1979 –<br>1992, with<br>prospectively<br>introduced<br>clinical<br>protocol for<br>consecutive<br>referrals 1993<br>– 2003, USA,<br>English | 359<br>prospective<br>referrals, 0 –<br>18 yrs 562,<br>retrospectiv<br>e cases, ages<br>unreported | Suspected beta-<br>lactam allergy                 | Not undertaken                                                                                                                                                                         | SPT & ID: Major<br>determinant<br>benzylpenicillo<br>yl polylysine,<br>Pen G, sodium<br>penicilloate<br>(Pen A)<br>Switch of<br>benzylpenicillo<br>yl polylysine<br>manufacturer<br>in 2001                        | 23 (6%) of 359 prospective<br>participants demonstrated +ve<br>skin testing, with 22 in 1993 and<br>1 in 2002. 154 (27%) of<br>retrospective case series<br>demonstrated +ve skin testing,<br>with decreasing trend from<br>1979 until all testing negative<br>from 1994.                                                                                                                            | 3 |
| Ponvert,<br>1999 *                 | Retrospective<br>clinical case<br>series<br>France,<br>English                                                                                                                       | 325,<br>0 – 18 yrs                                                                                 | Suspected beta-<br>lactam allergy                 | Incremental<br>DPTs<br>undertaken if<br>no history of<br>SSS, SJS or TEN.<br>If skin testing<br>+ve, DPT<br>undertaken to<br>alternative.<br>Incremental<br>DPT of index<br>antibiotic | SPT & ID:<br>Amox, Amp,<br>BP, Cefazolin,<br>Cefotaxime,<br>Ceftazidime,<br>Ceftriaxone,<br>Cephaloridin,<br>Cephalotin,<br>Cephmandole,<br>Oxacillin &<br>Ticarcillin                                             | 24 (7%) demonstrated +ve ID<br>tests, & 15 (5%) +ve DPTs. The<br>likelihood of beta-lactam allergy<br>was significantly higher for<br>anaphylaxis (42.9% versus 8.3%<br>in other reactions) and<br>immediate reactions (25%<br>versus 10% in accelerated and<br>delayed reactions). 68 (21%)<br>were diagnosed as beta-lactam<br>allergic, with 39 (12%) through<br>skin and DPT investigations, and | 3 |

|                      |                                                             |                                                              |                               |                                                                                                     |                                                                                                                                             |                                                                                                                                                                                                                                                                                                                                                                                                                                                                                                                                                                                                 |   |
|----------------------|-------------------------------------------------------------|--------------------------------------------------------------|-------------------------------|-----------------------------------------------------------------------------------------------------|---------------------------------------------------------------------------------------------------------------------------------------------|-------------------------------------------------------------------------------------------------------------------------------------------------------------------------------------------------------------------------------------------------------------------------------------------------------------------------------------------------------------------------------------------------------------------------------------------------------------------------------------------------------------------------------------------------------------------------------------------------|---|
|                      |                                                             |                                                              |                               | administered, with FU course for 5 – 7 days.                                                        |                                                                                                                                             | 29 (9%) due to SSS and toxidermia history. 8 (12%) were sensitized to several classes of beta-lactams: the proportion being higher amongst children with anaphylaxis (26.7% versus 7.5% of other reactions) and in children reporting immediate reactions (33.3% versus 8.5% of delayed reactions).                                                                                                                                                                                                                                                                                             |   |
| Chandra, 1980        | Prospective cross-sectional study, New Zealand, English     | 300 with suspected penicillin, "children" - age not reported | Suspected beta-lactam allergy | DPT undertaken in selected subset of 56 skin test negative participants, but procedure not reported | Benzylpenicilloyl-polylysine, MDM (sodium benzylpen G, sodium D-benzylpenicillate). RAST to benzylpenicilloyl and phenoxymethyl penicilloyl | 48 (16%) of 300 suspected penicillin allergic children demonstrated positive skin tests, and five of these received penicillin on a subsequent occasion and developed acute urticaria. Out of 56 undergoing DPT, two developed "slight erythematous, non-itchy rash". 42 of the children who demonstrated positive skin tests were investigated one year later, and 14 showed negative responses on both skin testing and DPT. Trend towards quicker trigger time and faster progression to investigation being related to higher likelihood of positive skin tests, although no P-trend given. | 3 |
| Graff-Lonnevig, 1988 | Prospectively introduced clinical protocol, Sweden, English | 298, 0 – 15 yrs                                              | Suspected beta-lactam allergy | Course of oral Pen V twice daily for 10 days, at least first dose supervised.                       | SPT using BP & Pen V. No ID testing undertaken. Serum RAST to Pen                                                                           | 30 (10%) of 297 undertaking DPT demonstrated a reaction, however 22 of these after day 6. Further questionnaire administered to 222 children 1 – 4 yrs after DPT received replies                                                                                                                                                                                                                                                                                                                                                                                                               | 3 |

|                 |                                                   |                     |                                               |                                                                                                                                                                                                    |                                                       |                                                                                                                                                                                                                                                                                                                                                                                                                                                                                                                         |   |
|-----------------|---------------------------------------------------|---------------------|-----------------------------------------------|----------------------------------------------------------------------------------------------------------------------------------------------------------------------------------------------------|-------------------------------------------------------|-------------------------------------------------------------------------------------------------------------------------------------------------------------------------------------------------------------------------------------------------------------------------------------------------------------------------------------------------------------------------------------------------------------------------------------------------------------------------------------------------------------------------|---|
|                 |                                                   |                     |                                               |                                                                                                                                                                                                    | metabolites, penicilloyl V and G amongst 277 children | indicating that 110 (50%) had received Penicillin and 7 of these demonstrated rash after at least 6 days of treatment. One child received Penicillin after a positive DPT, and demonstrated no adverse effects. 3 subjects showed borderline RAST results. 14(11%) of children with index urticaria reactions and 15 (42%) of angioedema or joint swelling reactions demonstrated +ve DPT, whereas none of those after index exanthematous reaction.                                                                    |   |
| Ponvert, 2007 * | Retrospective questionnaire<br>France,<br>English | 256 parents invited | Negative skin and DPT testing to beta-lactams | Incremental DPTs undertaken if no history of SSS, SJS or TEN. If skin testing +ve, DPT undertaken to alternative. Incremental DPT of index antibiotic administered, with FU course for 5 – 7 days. | SPT & ID: BP, Amox, Amp, Cefazolin & Ceftriaxone      | 141 (55%) questionnaires returned. 93 (66%) of these had been treated with beta-lactam antibiotics, and 7 (8%) reported allergic reactions. Of the six of these attending for investigations, one was diagnosed with delayed rash reaction after Co-Amox challenge and also Cefaclor SSS, after two adverse responses since previously negative skin testing. If non-attender was also allergic, authors report maximum of 2% subsequent reaction to any beta-lactams after preceding skin test and DPTs were negative. | 3 |
| Pichichero 1998 | Retrospective clinical case series, USA,          | 247, 0 – 18 yrs     | Paediatrician suspected beta-lactam allergy   | If skin test negative, single dose oral Pen                                                                                                                                                        | SPT & ID: PPL, BP, MDM, Amp, Cefazolin                | 53 (22%) of initial skin tests were +ve, with 5 (2%) of DPTs +ve, leading to 58 (23%) being                                                                                                                                                                                                                                                                                                                                                                                                                             | 3 |

|                    |                                                               |                                  |                                                                                                          |                                                                                                          |                                                                                                                                                        |                                                                                                                                                                                                                                                                                                    |   |
|--------------------|---------------------------------------------------------------|----------------------------------|----------------------------------------------------------------------------------------------------------|----------------------------------------------------------------------------------------------------------|--------------------------------------------------------------------------------------------------------------------------------------------------------|----------------------------------------------------------------------------------------------------------------------------------------------------------------------------------------------------------------------------------------------------------------------------------------------------|---|
|                    | English                                                       |                                  |                                                                                                          | challenge, with 5 – 10 day FU course of <i>index</i> antibiotic                                          | & Ceftriaxone (panel not completed in all subjects)                                                                                                    | diagnosed allergic. Of the 189 with negative skin tests, 26 (14%) then demonstrated +ve skin test one month later, and were also recommended to avoid Pen. 163 participants with negative skin tests and DPTs later received any beta-lactam treatment, and three (2%) demonstrated mild reactions |   |
| Martin-Munoz, 1999 | Retrospective clinical case series, Spain, English            | 239, children                    | Referred for evaluation of drug allergy, excluding anaphylaxis, SJS, Severe systemic reactions / illness | Where skin testing negative, DPT undertaken. Protocol not accessible                                     | Protocol not accessible                                                                                                                                | Reactions attributed to beta-lactam antibiotics in 50% & Sulphonamides in 9%. DPT undertaken when skin testing negative demonstrated 4% reactions                                                                                                                                                  | 3 |
| Minguez, 1998      | Retrospective clinical case series, Spain, English            | 219, children – age not reported | Suspected beta-lactam allergy                                                                            | Oral or intramuscular incremental DPT, without FU course, only if non-serious index reported             | SPT: Pen G, PPL, Amox, Amp, IV preparation of Co-Amox. ID and patch test to above agents only if delayed index response. CAP undertaken, not specified | 20 (9%) of 219 referrals were diagnosed as beta-lactam allergic (11 by SPT, 1 by sIgE, 2 by DPT and 6 owing to serious index reaction, 2 of which on more than one occasion). All 3 children undergoing ID and patch testing gave negative results                                                 | 3 |
| Chambel, 2010      | Prospectively introduced clinical protocol, Portugal, Spanish | 161, 0 – 14 yrs                  | Suspected beta-lactam allergy                                                                            | DPT to either index antibiotic, or an alternative where skin tests +ve or if parents wished. Incremental | 47 children underwent skin testing by choice: SPT & ID: PPL, MDM, Pen, Amox, Co-Amox & Cefuroxime. 106 underwent                                       | 33 (21%) reported immediate index reaction. 11 (13%) of children demonstrated a +ve DPT to index beta-lactam when skin testing not performed, and 1 (3%) +ve DPT to index where index skin testing negative. 47 children underwent optional skin testing, which was +ve to ID                      | 3 |

|                 |                                                    |                 |                                                           |                                                                                                                                                                                                                                    |                                                                                                                                                                                                                                |                                                                                                                                                                                                                                                                                                                      |   |
|-----------------|----------------------------------------------------|-----------------|-----------------------------------------------------------|------------------------------------------------------------------------------------------------------------------------------------------------------------------------------------------------------------------------------------|--------------------------------------------------------------------------------------------------------------------------------------------------------------------------------------------------------------------------------|----------------------------------------------------------------------------------------------------------------------------------------------------------------------------------------------------------------------------------------------------------------------------------------------------------------------|---|
|                 |                                                    |                 |                                                           | dosing, with 5 day FU course at home.                                                                                                                                                                                              | serum sIgE to Amox, Pen G & Pen V                                                                                                                                                                                              | in 8 (17%) cases (two of whom were also sIgE +ve). Having a +ve DPT to either index or alternative antibiotic was associated with food allergy                                                                                                                                                                       |   |
| Bierman, 1969   | Retrospective clinic case series, USA, English     | 160, 0 – 14 yrs | Inpatient, with physician diagnosis of penicillin allergy | Penicillin re-administered where tests negative and treatment still clinically warranted whilst admitted.                                                                                                                          | BP & PPL SPT. ID with patient's own serum, then either BP or PPL.                                                                                                                                                              | 17 (11%) +ve skin tests, and three acute, four intermediate (2 – 48hrs) and 10 late reactions demonstrated after continued penicillin administration. DPT reactions included coughing, laryngeal oedema and hypotension when DPTs undertaken at the time of acute illness. Overall, 34 (21%) demonstrated +ve signs. | 3 |
| Romano, 2008    | Retrospective clinical case series, Italy, English | 148, 2 – 14yrs  | Suspected allergy to Ceph                                 | Incremental oral or intramuscular DPT to index Ceph in one day for immediate index reactions, and weekly doses for non-immediate reactions. FU courses for one week amongst immediate index reactors with negative skin test & DPT | SPT & ID: PPL, MDM, BP & Ceph - manufacturer swap in 2005<br><br>Patch and serum sIgE CAP to penicilloyl G & V, ampicilloyl, amoxicilloyl and Cefaclor amongst 43 children with immediate index reactions (cut-off > 0.35kU/l) | 43 (29%) reported immediate reactions (anaphylaxis, urticaria, angioedema & rash) and 34 demonstrated +ve skin test. 105 (71%) had non-immediate reactions (urticaria & EM predominated) one of whom had +ve ID test, but all had negative patch and delayed skin test reading results.                              | 3 |
| Cetinkaya, 2004 | Prospectively                                      | 147, 6 – 14 yrs | Children admitted to hospital with                        | Not undertaken                                                                                                                                                                                                                     | SPT & ID to PPL & MDM                                                                                                                                                                                                          | SPT demonstrated one positive response to PPL, and ID                                                                                                                                                                                                                                                                | 3 |

|                               |                                                             |                                                                     |                                                                               |                                                                                                                                                      |                                                                                                                            |                                                                                                                                                                                                                                                      |   |
|-------------------------------|-------------------------------------------------------------|---------------------------------------------------------------------|-------------------------------------------------------------------------------|------------------------------------------------------------------------------------------------------------------------------------------------------|----------------------------------------------------------------------------------------------------------------------------|------------------------------------------------------------------------------------------------------------------------------------------------------------------------------------------------------------------------------------------------------|---|
|                               | introduced clinical protocol, Turkey, English               |                                                                     | upper respiratory tract infection who had tolerated three beta-lactam courses |                                                                                                                                                      | (including BP)                                                                                                             | demonstrated 11 PPL responses and three MDM responses: 15 children demonstrated at least one positive skin test. One participant demonstrated a mild systemic reaction after PPL ID testing and received adrenaline and antihistamine injections.    |   |
| Mori, 2014                    | Retrospective clinical case series, Italy, English          | 136 children                                                        | Suspected Macrolide allergy                                                   | DPTs undertaken but protocol not reported, nor amongst how many participants                                                                         | SPT & ID: ENDA protocol referenced, but no protocol details reported                                                       | Only 66 participants completed investigations, 3 (5%) demonstrated positive SPT (in two) and ID testing (in one). One participant had history of anaphylaxis to both Azithr & Clarithr, suggesting co-reactivity                                     | 3 |
| Atanaskovi c-Markovic, 2009 * | Prospectively introduced clinical protocol, Serbia, English | 124, 3 – 14 yrs                                                     | Suspected beta-lactam allergy with +ve skin tests                             | Single day Imipenem-cilastatin intramuscular or intravenous incremental challenge amongst children with negative skin testing to Imipenem-cilastatin | SPT and ID to PPL, MDM, BP, Amp, Amox & Meropenem                                                                          | 1 of 124 (1%) reacted to ID Imipenem/Cilastatin (a 5yr boy with 6mm wheal). None of 123 participants undergoing intramuscular or intravenous challenge to Imipenem/Cilastatin demonstrated clinical reaction.                                        | 3 |
| Atanaskovi c-Markovic, 2008 * | Prospectively introduced clinical protocol, Serbia, English | 108, 3 – 14 yrs (beta-lactam cases) compared to 20 healthy children | Suspected beta-lactam allergy with +ve skin tests                             | Single day Meropenem DPT amongst children with negative skin testing to Meropenem                                                                    | SPT and ID to PPL, MDM, BP, Amp, Amox & Meropenem. Serum sIgE to penicilloyl G, penicilloyl V, amoxicilloyl, ampicilloyl > | 1 of 108 (1%) beta-lactam cases demonstrated positive (5mm) ID Meropenem, whereas no beta-lactam cases reacted to SPT Meropenem. All 107 beta-lactam cases undergoing Meropenem DPT were negative. No controls reacted to Meropenem ID, however none | 3 |

|               |                                                                                                                 |                 |                                                                                                                                      |                                                                                                                            |                                                                                                                                                                 |                                                                                                                                                                                                                                                                                                      |   |
|---------------|-----------------------------------------------------------------------------------------------------------------|-----------------|--------------------------------------------------------------------------------------------------------------------------------------|----------------------------------------------------------------------------------------------------------------------------|-----------------------------------------------------------------------------------------------------------------------------------------------------------------|------------------------------------------------------------------------------------------------------------------------------------------------------------------------------------------------------------------------------------------------------------------------------------------------------|---|
|               |                                                                                                                 |                 |                                                                                                                                      |                                                                                                                            | 0.35kU/l +ve.                                                                                                                                                   | underwent DPT either. 14 of 108 cases +ve to PenG and/or PenV sIgE                                                                                                                                                                                                                                   |   |
| Kavadas, 2013 | Retrospective clinical case series, Canada, English                                                             | 42, 0 – 18 yrs  | Suspected beta lactam allergy, excluding anaphylaxis, SSS, SJS, TEN and participants who had alternative suitable antibiotic choices | Index antibiotic given (oral or intravenous), if skin testing negative in all but one case. Further protocol not reported. | SPT & ID: Amino, Azithr, Cotrimoxazole, Cefazolin, Ceftriaxon, Cefuroxime, Clindamycin, Cefazolin, Ceftazidime, Cotrimoxazole, Erythromycin, Levofloxacin, Vanc | One SPT was +ve, 11 demonstrated positive skin testing results (6 Cotrimoxazole, 1 Erythromycin, 1 Vanc, 1 Ceftriaxone, 2 Azithr). Some participants undertook more than one challenge, and 3 of 42 DPTs were +ve. One ID +ve participant underwent DPT, because index reaction involved hypotension | 3 |
| Ahmed, 2012   | Retrospective clinical case series, with further record examination for later prescription of Ceph USA, English | 173, 0 - 18 yrs | Suspected beta-lactam allergy and subsequent course of Ceph                                                                          | None conducted, rather medical records inspected for subsequent administration of Ceph                                     | Benzylpenicilloyl polylysine, penicillin G potassium, penicilloate & Amox                                                                                       | 21 (12%) demonstrated positive skin testing, none of whom demonstrated signs on later Ceph exposure. One 4 year old boy with history of delayed rash with amoxicillin developed angioedema 5 days after oral Cephalexin.                                                                             | 2 |
| Rosh, 1968    | Case control study, USA, English                                                                                | 172, 0 – 16yrs  | 73 cases with suspected Pen allergy, 99 controls without                                                                             | DPT as open course of Pen, Methicillin or Oxacillin amongst 10 subjects                                                    | ID: BP/Pen G, PPL-12, PPL-12C. Serum haemagglutination with BP                                                                                                  | 6 (8%) of cases demonstrated +ve IDs, 5 of whom also had +ve serum response to BP. One of these underwent DPT, and reacted to Pen with urticaria. Two cases without +ve skin tests passed Pen DPTs. 6 (6%) of controls demonstrated +ve ID tests to PPLs.                                            | 2 |
| Kamada, 1991  | Prospectively introduced clinical                                                                               | 120 children    | Suspected multiple antibiotic allergy                                                                                                | Not undertaken                                                                                                             | Pen G (benzyl penicilloyl polylysine),                                                                                                                          | 31 (21%) of the participants demonstrated +ve skin testing                                                                                                                                                                                                                                           | 2 |

|                              | protocol,<br>USA, English                                                 |                   |                                   |                                                                                                                                                                                                                                                                           | MDM, beta<br>lactam<br>analogue                                                              |                                                                                                                                                                                                                                                                                                                                                                                                                                                                                                         |   |
|------------------------------|---------------------------------------------------------------------------|-------------------|-----------------------------------|---------------------------------------------------------------------------------------------------------------------------------------------------------------------------------------------------------------------------------------------------------------------------|----------------------------------------------------------------------------------------------|---------------------------------------------------------------------------------------------------------------------------------------------------------------------------------------------------------------------------------------------------------------------------------------------------------------------------------------------------------------------------------------------------------------------------------------------------------------------------------------------------------|---|
| Birkebaek,<br>1992           | Retrospective<br>clinic case<br>series,<br>Denmark,<br>Danish             | 109,<br>0-16 yrs  | Suspected<br>penicillin allergy   | DPT to<br>penicillin, if<br>skin and sIgE<br>tests negative                                                                                                                                                                                                               | Skin testing not<br>undertaken in<br>substantial<br>proportion.<br>Serum sIgE Pen            | 107 children underwent Pen<br>DPT and only one (1%)<br>demonstrated urticaria five<br>hours after dose. Two were +ve<br>for sIgE Pen.                                                                                                                                                                                                                                                                                                                                                                   | 2 |
| Kamboj,<br>2010              | Retrospective<br>clinical case<br>series, USA,<br>English                 | 96 children       | Suspected<br>antibiotic allergy   | Protocol<br>inaccessible                                                                                                                                                                                                                                                  | Protocol<br>inaccessible                                                                     | 4 (4%) demonstrated +ve skin<br>testing, and 4 (4%) +ve DPTs. 87<br>(91%) tolerated skin testing and<br>DPT                                                                                                                                                                                                                                                                                                                                                                                             | 2 |
| Perez-<br>Rodriguez,<br>2006 | Retrospective<br>clinical case<br>series, Spain,<br>English               | 91,<br>4 – 16 yrs | Suspected beta-<br>lactam allergy | DPT if skin<br>testing<br>negative,<br>protocol not<br>reported                                                                                                                                                                                                           | SPT (& ID if ><br>12 yrs): Major<br>and minor<br>determinants,<br>Pen G, index<br>antibiotic | Skin and DPT investigations<br>were repeated after 15 days.<br>Only one “positive result”<br>reported, without detailing<br>whether through skin or DPT, or<br>whether repeated 15 days later                                                                                                                                                                                                                                                                                                           | 2 |
| Mori,<br>2012                | Prospectively<br>introduced<br>clinical<br>protocol,<br>Italy,<br>English | 89,<br>2 – 9 yrs  | Suspected Co-<br>Amox allergy     | Single blinded<br>incremental<br>oral DPT to Co-<br>Amox, Sodium<br>Benzoate<br>(excipient) and<br>placebo, in<br>randomized<br>order, and<br>continued for 5<br>day FU course.<br>Delayed DPT<br>responses were<br>investigated<br>with double-<br>blind DPT<br>protocol | SPT & ID: beta-<br>lactam<br>reagents –<br>individual<br>preparations<br>not reported        | Eight (9%) demonstrated +ve<br>DPT to Co-Amox, but negative<br>to Sodium Benzoate. 10 (11%)<br>+ve to Sodium Benzoate but<br>negative to Co-Amox, and three<br>(3%) were +ve to both Co-Amox<br>and Sodium Benzoate DPTs. No<br>participants reacted to placebo<br>DPT. 10 (11%) of participants<br>had idiopathic urticaria, two of<br>whom reacted to both Co-Amox<br>and Sodium Benzoate on DPT.<br>10 (91%) of 11 participants with<br>delayed DPT responses were<br>confirmed on double-blind DPT. | 2 |
| Huang,<br>1998               | Prospectively<br>introduced                                               | 86,<br>0 – 6 yrs  | Suspected<br>antibiotic allergy   | Single dose DPT<br>to index                                                                                                                                                                                                                                               | SPT & ID:<br>benzylpenicillo                                                                 | One (1%) participant<br>demonstrated +ve skin test, and                                                                                                                                                                                                                                                                                                                                                                                                                                                 | 2 |



|               |                                                            |                     |                               |                                                                                                                                              |                                                                                                                   |                                                                                                                                                                                                                                                                                                                                                         |   |
|---------------|------------------------------------------------------------|---------------------|-------------------------------|----------------------------------------------------------------------------------------------------------------------------------------------|-------------------------------------------------------------------------------------------------------------------|---------------------------------------------------------------------------------------------------------------------------------------------------------------------------------------------------------------------------------------------------------------------------------------------------------------------------------------------------------|---|
|               | clinical protocol, USA, English                            |                     |                               | antibiotic without FU course amongst skin test negative participants - and then further single dose DPT when child next became unwell        | yl polylysine, Penicilloic acid & Pen G<br><br>Serum RAST to penicilloyl G & V amongst 52 participants            | none of remaining 85 participants developed +ve DPT to index antibiotic whilst well. 65 participants became unwell in the following two years and chose to receive the same antibiotic using either the same (n=3) preparation or dye-free (n=62), eight (12%) of the latter whom demonstrated a mild rash, which did not preclude completion of course |   |
| Romano, 1997  | Retrospective clinical case series, Italy, English         | 82, 3 – 12 yrs      | Suspected beta-lactam allergy | Incremental doses of either oral Amox or Amp at weekly intervals, no FU course, if skin testing negative & index reaction occurred < 1yr ago | SPT & ID: PPL, MDM, Pen G, Amp.<br><br>Serum RAST to Pen G, Pen C, Amp & Amox                                     | Four (5%) were +ve to skin tests (two to index allergen, one to Pen G, one to PPL & Pen C: SPT and ID not reported, although one of these was +ve RAST to Pen G & V). 11 children with immediate reaction histories and 38 with delayed morbilliform rashes underwent DPT, and all were negative.                                                       | 2 |
| Moral, 2011   | Prospectively introduced clinical protocol, Spain, English | 78, 0 – 14 yrs      | Suspected beta-lactam allergy | Oral incremental DPT if no sensitisation detected                                                                                            | SPT & ID amongst higher risk index reactions: PPL, MDM, Pen and index antibiotic<br><br>Serum sIgE to Pen G, Amox | 56 (72%) were termed low risk, and 50 of these proceeded directly to DPT with only one (2%) demonstrating mild delayed rash (not urticaria) twice after repeated DPT. None of the 17 children undergoing skin testing prior to DPT demonstrated +ve results on either skin or DPT testing.                                                              | 2 |
| Langley, 2002 | Retrospective clinical case series, Canada,                | 74, mean age 7.4yrs | Suspected beta-lactam allergy | For skin test negative participants, a single dose of                                                                                        | SPT & ID: benzylpenicilloyl-polylysin, Pen G,                                                                     | No SPT were +ve, 3 (4%) demonstrated +ve ID response and no reactions were observed amongst 69 who proceeded to                                                                                                                                                                                                                                         | 2 |

|                | English                                              |                |                                                     | index beta lactam administered orally and monitored for one hour                       |                                                                                                           | DPT.                                                                                                                                                                                                                                                                                                                                  |   |
|----------------|------------------------------------------------------|----------------|-----------------------------------------------------|----------------------------------------------------------------------------------------|-----------------------------------------------------------------------------------------------------------|---------------------------------------------------------------------------------------------------------------------------------------------------------------------------------------------------------------------------------------------------------------------------------------------------------------------------------------|---|
| Seitz, 2012    | Retrospective clinical case series, Germany, English | 43, 5 – 16 yrs | Suspected drug allergy                              | Incremental dosage to index drug, no report of FU courses for antibiotics.             | SPT & ID: reagents not reported.<br>Serum sIgE BPO, phenoxymethyl penicilloyl, amoxicilloyl & ampicilloyl | 24 (56%) reported immediate reactions, 10 due to beta-lactams and 8 due to macrolides: none of these 18 reacted to either skin tests or DPT. 19 (44%) reported non-immediate reactions, 12 due to beta-lactams, 6 due to macrolides and 1 to Clindamycin: and one of these demonstrated delayed skin test +ve response for Amox & Amp | 2 |
| Navarro, 1985  | Retrospective clinical case series, Spain, English   | 16, 2 – 9 yrs  | Adverse reaction to intravenous Pen G               | DPT protocol inaccessible                                                              | SPT & ID: Major determinant & MDM                                                                         | Eight participants demonstrated a +ve response to either skin testing or DPT.                                                                                                                                                                                                                                                         | 2 |
| Berroa, 2013   | Retrospective clinic case series, Spain, English     | 14, 0 – 14 yrs | Suspected beta-lactam non-immediate allergy         | Where skin testing negative, DPT to original oral beta-lactam preparation for one week | PPL, MDM, BP & Amox.<br>Serum sIgE to Pen and Amox.                                                       | All skin testing was negative, and 7 (50%) demonstrated maculopapular rash on DPT                                                                                                                                                                                                                                                     | 2 |
| Novembre, 2009 | Retrospective clinical case series, Italy, English   | 13, 3 – 14 yrs | Referral with suspected anaphylaxis to beta lactams | DPT in accordance with guidance, protocol not reported                                 | SPT & ID: PPL, MDM, Amox, Cefaclor.<br>Serum sIgE to penicilloyl G, Penicilloyl V, Ampicilloyl &          | 13 (5%) reported anaphylactic reactions (8 to Cefaclor, 2 to Ceftriaxone, 2 to Amox, 1 to BP). The eight Cefaclor anaphylaxis participants all demonstrated +ve responses to Cefaclor on skin testing. Two had Cefaclor +ve sIgE. One of                                                                                              | 2 |

|                 |                                                                                                                                |                                                                     |                                                     |                                   |                                                                                                |                                                                                                                                                                                                                                                                                                                                 |   |
|-----------------|--------------------------------------------------------------------------------------------------------------------------------|---------------------------------------------------------------------|-----------------------------------------------------|-----------------------------------|------------------------------------------------------------------------------------------------|---------------------------------------------------------------------------------------------------------------------------------------------------------------------------------------------------------------------------------------------------------------------------------------------------------------------------------|---|
|                 |                                                                                                                                |                                                                     |                                                     |                                   | Cefaclor                                                                                       | these eight demonstrated +ve skin testing to Amox also, however all of the remaining seven tolerated Amox DPT.                                                                                                                                                                                                                  |   |
| Tortajada, 2008 | Retrospective clinical case series, Spain, English                                                                             | 10, 4 – 12 yrs                                                      | History of reaction to Co-Amox                      | DPT to Co-Amox & Clavulanic Acid: | Penicilloyl G & V, Amox, Amp & Cefaclor. Serum sIgE to Penicilloyl G & V, Amox, Amp & Cefaclor | Each of these were positive to both Co-Amox and Clavulanic Acid alone on DPT                                                                                                                                                                                                                                                    | 2 |
| Schauf, 1985    | Questionnaire 2 years after RCT of neonatal Pen G injection intervention to prevent Group B Streptococcal sepsis, USA, English | 420 parents of neonatal RCT participants interviewed over the phone | 200 neonates were Pen G recipients, and 220 placebo | Not undertaken                    | Serum RAST IgG (n=107) and IgE (n=6) to major Benzyl Penicilloyl                               | 220 (52%) received a beta-lactam < 2 yrs of age, 109 amongst neonatal pen recipients and 111 amongst placebo. 10 (9%) of 109 neonatal Pen recipients versus 12 (11%) of 111 placebo recipients reported possible beta-lactam allergy: no association between neonatal Pen injection & either suspected allergy or RAST results. | 1 |
| Balaban, 2002   | Retrospective clinic case series, Bosnia Herzegovina, English                                                                  | 132, 0 - 16 yrs                                                     | Physician diagnosed urticaria                       | Not undertaken                    | Not undertaken                                                                                 | 17 (13%) took antibiotics and 6 (5%) took antibiotics & antipyretics directly before urticaria developed.                                                                                                                                                                                                                       | 1 |
| Lesniak, 2013   | Retrospective clinical case series, Poland, Polish                                                                             | 846, 0 – 18 yrs                                                     | Clinical presentations of adverse drug reactions    | Not undertaken                    | Not undertaken                                                                                 | 19% of cases were attributed to antibiotics. 402 (48%) cases presented as rashes alone, although 44 (5%) diagnosed as anaphylaxis, 46 (5%) non-immune anaphylaxis and one (0%) as SJS.                                                                                                                                          | 1 |
| Picard, 2012    | Telephone questionnaire                                                                                                        | 200 parents                                                         | Parents of children with negative Pen               | Not undertaken during this        | Not undertaken during this                                                                     | 170 (85%) of parents answered questions: 130 (76%) had                                                                                                                                                                                                                                                                          | 1 |

|                |                                                                  |                 |                                         |                                                                                                         |                |                                                                                                                                                                                                                                                                                       |   |
|----------------|------------------------------------------------------------------|-----------------|-----------------------------------------|---------------------------------------------------------------------------------------------------------|----------------|---------------------------------------------------------------------------------------------------------------------------------------------------------------------------------------------------------------------------------------------------------------------------------------|---|
|                | Canada, English                                                  |                 | skin test & DPT                         | study                                                                                                   | study          | received antibiotics since investigations, 59 (45%) had received Pen A, 24 (18%) had refused Pen A because they feared adverse response.                                                                                                                                              |   |
| Khoo, 2000     | Retrospective clinical case series, Singapore, English           | 111, 0 – 12 yrs | Fixed drug eruption                     | Not undertaken                                                                                          | Not undertaken | Suspected drug was Aminopenicillin in 59%, Co-Trimoxazole in 19%.                                                                                                                                                                                                                     | 1 |
| Miller, 2011   | Retrospective questionnaire USA, English                         | 100, 0 – 18 yrs | Parental reported antibiotic allergy    | Not undertaken                                                                                          | Not undertaken | Possible immune-related reaction described in 58%, non-immune-related reaction described in 27%                                                                                                                                                                                       | 1 |
| Anibarro, 1992 | Retrospective clinical case series, Spain, Spanish               | 72, 0 - 18 yrs  | Suspected drug allergy                  | None conducted                                                                                          | None conducted | 29 (40%) had history of immediate reactions, and Sulphonamide fixed drug reactions was most common non-immediate allergy                                                                                                                                                              | 1 |
| Morelli, 1999  | Retrospective clinical case series, USA, English                 | 35, 1 – 16 yrs  | Physician diagnosed fixed drug eruption | For selection of cases, repeat administration of Trimethoprim-Methoxazole. Full protocol not described. | Not undertaken | 18 (51%) were attributed to Trimethoprim-Sulfamethoxazole, 4 (11%) to Sulphonamide alone, 1 (3%) to Amp, 1 (3%) to Amox & 1 (3%) to Erythromycin. 19 (54%) had recurrence of FDE. 5 children underwent re-challenge with Trimethoprim-Sulphamethoxazole, and demonstrated a reaction. | 1 |
| Mattheij, 2012 | Prospectively introduced clinical protocol, Netherlands, English | 33, 0 – 16 yrs  | Suspected antibiotic allergy            | Open oral DPT undertaken to index antibiotic, not reported if FU course                                 | Not undertaken | 4 (12%) of 33 demonstrated positive response by mild skin reactions on DPT.                                                                                                                                                                                                           | 1 |

|                   |                                                                                       |                                                                          |                                                                              |                |                                           |                                                                                                                                                                                                            |   |
|-------------------|---------------------------------------------------------------------------------------|--------------------------------------------------------------------------|------------------------------------------------------------------------------|----------------|-------------------------------------------|------------------------------------------------------------------------------------------------------------------------------------------------------------------------------------------------------------|---|
| Park, 2000        | Retrospective clinical case series from allergy department referrals, Canada, English | 97, 0 – 13 yrs                                                           | Suspected multiple antibiotic allergy                                        | Not undertaken | Not undertaken                            | Suspected multiple antibiotic allergy constituted 11% of all referrals to drug allergy service. 83 (86%) reacted to a Pen derivative, 78 (80%) to Sulphonamide, 69 (71%) to a Ceph, 34 (35%) to Macrolides | 0 |
| Khaled, 2012      | Retrospective clinical case series, Tunisia, English                                  | 90, 0 – 16 yrs                                                           | Diagnosed with cutaneous eruption whilst receiving drugs                     | Not undertaken | Not undertaken                            | 52 (58%) presented with maculopapular rash, 15 (17%) urticaria, 13 (14%) fixed drug eruption, 2 (2%) EM. 50 (56%) were attributed to antibiotics                                                           | 0 |
| Strannegård, 1987 | Case control study, Sweden, English                                                   | 30 cases, 4 – 12 yrs with Rheumatic Fever, & 29 controls with acute PSGN | 18 received mean 1.8 yrs of Pen G depot injections for bacterial prophylaxis | Not undertaken | Serum RAST IgE to Penicilloyl determinant | Two (11%) of Pen G recipients demonstrated raised IgE to Pen G & V, without their demonstrating adverse reactions to depot Pen injections.                                                                 | 0 |
| Wills, 1998       | Retrospective clinical case series, Australia, English                                | 53 children                                                              | Children with Cystic Fibrosis                                                | Not undertaken | Not undertaken                            | 18 (34%) had experienced a suspected reaction, with intravenous antibiotics producing more suspected reactions than oral, in that 9.5% of intravenous antibiotic courses produced adverse effects          | 0 |
| Rallis, 2006      | Retrospective clinical case series, Ireland, English                                  | 47, 0 – 15 yrs                                                           | ENT patients with cutaneous adverse drug reactions                           | Not undertaken | Not undertaken                            | Urticaria, maculopapular rash, fixed drug eruption and EM were most common reactions. Drugs included Co-Amox, Ceph, Clarithr, Clindamycin & Erythromycin                                                   | 0 |
| Adegbidi, 2012    | Retrospective clinical case                                                           | 35, 0 – 16 yrs                                                           | Suspected drug induced rash                                                  | Not conducted  | Not conducted                             | 21 patients (60%) were advised to avoid particular drug: 14 of                                                                                                                                             | 0 |

---

series, Benin,  
French

the 21 were antibiotic (11  
Sulphonamides, 2 Penicillin, 1  
Ceftriaxone). Clinical patterns:  
fixed drug eruption 16/35  
(46%), maculopapular rash 6/35  
(17%), SJS 6/35 (17%), urticaria  
3/35 (9%), TENS 1/35 (3%)

---

Abbreviations: ALTE – Acute Life Threatening Event, Amino – Aminoglycoside, Amox – Amoxicillin, Amp – Ampicillin, aOR – adjusted Odds Ratio, Azithr – Azithromycin, BP – Benzyl Penicillin, Ceph – Cephalosporins, Clarithr – Clarithromycin, Co-Amox – Amoxicillin with Clavulanic Acid, DPT – Drug Provocation Test, EM – Erythema Multiforme, FU – follow-up, ID – Intra-Dermal MDM – Minor Determinant Mixture, Pen – Penicillin, PPL – penicilloyl penicilloate, PSGN - Post-Streptococcal Glomerulonephritis, RCT – Randomised Controlled Trial, SJS – Stevens Johnson Syndrome, SSS – Serum Sickness-like Syndrome, TEN – Toxic Epidermal Necrolysis, Vanc – Vancomycin

**Table 3. Studies investigating suspected non-immediate serious antibiotic allergic children**

| <i>First author Year</i>  | <i>Study type Country, language</i>                                                  | <i>No. of study subjects, age</i>                                                   | <i>Inclusion criteria</i>                                                                                                                                                          | <i>Antibiotic DPT protocol</i>                                                   | <i>Skin testing protocol</i>                                 | <i>Results</i>                                                                                                                                                                                                                                                                                          | <i>Quality score (out of 7)</i> |
|---------------------------|--------------------------------------------------------------------------------------|-------------------------------------------------------------------------------------|------------------------------------------------------------------------------------------------------------------------------------------------------------------------------------|----------------------------------------------------------------------------------|--------------------------------------------------------------|---------------------------------------------------------------------------------------------------------------------------------------------------------------------------------------------------------------------------------------------------------------------------------------------------------|---------------------------------|
| Rauci, 2013               | Case control study of SJS, Italy, English                                            | 29 SJS cases, 1,362 controls who attended A&E for neurological disorder, 0 – 15 yrs | Presentation to A&E with mucocutaneous condition, which was diagnosed as SJS or TEN on discharge                                                                                   | Not undertaken                                                                   | Not undertaken                                               | Participants selected from multicentre Italian 13 year long surveillance study.<br><br>SJS cases were more frequently exposed to drugs with aOR 2.4 (1.0 – 6.1): anticonvulsants aOR 26.8 (8.4 – 86.0) & antibiotics aOR 3.3 (1.5 – 7.2)                                                                | 3                               |
| <b>Blanca-Lopez, 2009</b> | Retrospective clinic case series, Spain, English                                     | 39, 0-14 yrs                                                                        | Suspected Amox & Co-Amox non-immediate allergy with osteo-articular involvement & SSS                                                                                              | Incremental oral Amox DPT, if skin testing negative, with following 5 day course | ID only to PPL, MDM, BP & Amox.<br>Serum sIgE to BP and Amox | 1 (3%) of 39 demonstrated a positive skin test. 19 (50%) of 38 demonstrated a positive oral DPT, ranging 1 to 8 days after starting challenge (median 7 days), with 10 reported to develop wheals, 12 with itching & at least 4 with joint swelling (says seven with osteo-articular reactions in text) | 2                               |
| King, 2003                | Retrospective clinical case series from medical records database, Australia, English | 150, 0 – 16 yrs                                                                     | Search for diagnostic codes relating to potential SSS, with FU call to parents for corroborating history, to identify rash with joint involvement presenting to emergency facility | Not undertaken                                                                   | Not undertaken                                               | 70 (47%) attributed to Cefaclor, 10 (7%) combinations of antibiotics including Cefaclor, 66 (44%) other antibiotics, 4 (3%) other combinations of antibiotics.                                                                                                                                          | 1                               |
| Forman, 2002              | Retrospective clinical case                                                          | 61 children, mean age                                                               | All records listing bullous EM, SJS or                                                                                                                                             | Not undertaken                                                                   | Not undertaken                                               | 30 with bullous EM, 28 with SJS, three with TEN. 16 (26%) were                                                                                                                                                                                                                                          | 0                               |

|                        |                                                    |                |                                                                                                                            |                |                                                      |                                                                                                                                                                                                                                                    |   |
|------------------------|----------------------------------------------------|----------------|----------------------------------------------------------------------------------------------------------------------------|----------------|------------------------------------------------------|----------------------------------------------------------------------------------------------------------------------------------------------------------------------------------------------------------------------------------------------------|---|
|                        | series, Canada, English                            | 4.8 yrs        | TEN over 10 yr period                                                                                                      |                |                                                      | likely due to Sulphonamides, 16 (26%) due to Penicillins, 8 (13%) to Ceph's & 4 (7%) to Erythromycin                                                                                                                                               |   |
| Ginsburg, 1982         | Retrospective clinical case series, USA, English   | 51, 0 – 14 yrs | Suspected SJS admitted during 22 yr period                                                                                 | Not undertaken | Not undertaken                                       | 14 to Sulphonamides, 11 to Benzyl Penicillin G, 2 to Doxycycline                                                                                                                                                                                   | 0 |
| Dore, 2007             | Retrospective clinical case series, USA, English   | 32, 0 – 17 yrs | Patients referred to a burn centre for exfoliative eruptions consistent with diagnosis of EM, SJS / TEN (biopsy confirmed) | Not undertaken | Not undertaken                                       | Of these 32, 10 were EM (3 to Amox, 1 Co-Amox, 1 Azithr/Ibuprofen, 1 Ceftin), 18 were SJS (1 to Amox, 1 Azithr, 4 Azithr/Ibuprofen, 1 Cefixime/Ibuprofen, 1 Clarithr/Ibuprofen, 2 Trimeth-Sulfamethoxazole) and 4 were TEN (1 to Azithr/Ibuprofen) | 0 |
| Zhang, 2008            | Retrospective clinical case series, China, Chinese | 20 children    | Diagnosed with Acute Generalised Exanthematous Pustulosis                                                                  | Not undertaken | Not undertaken                                       | Six were receiving Pen, three Ceph's & two Sulphonamides.                                                                                                                                                                                          | 0 |
| Ferrandiz-Pulido, 2010 | Retrospective clinical case series, Spain, English | 14, 1 – 14 yrs | All patients leaving teaching hospital with diagnosis of SJS or TEN over 10 yrs                                            | Not undertaken | Not undertaken                                       | Eight cases of SJS and six TEN. All possible trigger agents are listed for each case, with three of eight SJS, and two of six TEN including antibiotics.                                                                                           | 0 |
| Chopra, 1989           | Retrospective case series, Canada, English         | 11, 0 – 10 yrs | Suspected Amox allergy with serious systemic reactions                                                                     | Not undertaken | Major and minor determinant mixtures of BP and minor | 10 had SSS and one EM. Negative skin testing for the only patient investigated and all 10 RAST tests were negative.                                                                                                                                | 0 |

Abbreviations: Amox – Amoxicillin, Azithr – Azithromycin, BP – Benzyl Penicillin, Ceph's – Cephalosporins, Co-Amox – Amoxicillin with Clavulanic Acid, DPT – Drug Provocation Test, EM – Erythema Multiforme, ID – Intra-Dermal, MDM – Minor Determinant Mixture, Pen – Penicillin, PPL – penicilloyl penicilloate, PSGN, SJS – Stevens Johnson Syndrome, SSS – Serum Sickness-like Syndrome, TEN – Toxic Epidermal Necrolysis
